# Supplementary material for: Findings from the development and implementation of a novel course consisting of both group and individual Alexander Technique lessons for low back pain
Source: HighWire-hosted journal article supplement (doi:10.1136/bmjopen-2020-039399), 2022-01-01
Supplement: bmjopen-2020-039399supp001_data_supplement.pdf [file bmjopen-2020-039399supp001_data_supplement.pdf]

## Appendix A

| Week 1                             | Week 2                             | Week 3                     | Week 4                     | Week 5                     | Week 6                             | Week 7                     | Week 8                             | Week 9                     | Week 10                     |
|------------------------------------|------------------------------------|----------------------------|----------------------------|----------------------------|------------------------------------|----------------------------|------------------------------------|----------------------------|-----------------------------|
| Session 1:<br>Individual<br>Lesson | Session 2:<br>Individual<br>Lesson | Session 3:<br>Group Lesson | Session 4:<br>Group Lesson | Session 5:<br>Group Lesson | Session 6:<br>Individual<br>Lesson | Session 7:<br>Group Lesson | Session 8:<br>Individual<br>Lesson | Session 9:<br>Group Lesson | Session 10:<br>Group Lesson |
